# Supplementary material for: Survey on Sildenafil, Tadalafil, and Vardenafil Concentrations in Food Supplements for Erectile Dysfunction
Source: Hindawi journal article supplement (doi:10.1155/2022/3950190), 2022-07-09
Supplement: f1 [file 3950190.f1.pdf]

The performed analytical tests for determination of drug substances showed 70% of the tested 20 Food Supplements samples contained undeclared ingredients of a medical product administered for the management of erectile dysfunction. Food supplements adulterated with sildenafil analogues present a risk for customers' health because the toxicity of modified sildenafil is not known.

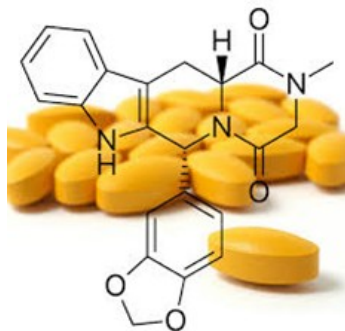

**Survey on Sildenafil, Tadalafil, and Vardenafil concentrations in food supplements for erectile dysfunction**

**Elina Petkova-Gueorguieva,**

**Stanislav Gueorguiev, Hristina Lebanova,**

**Vasil Madzharov, Anna Mihaylova\***
